# Supplementary material for: Rab11 suppresses neuronal stress signaling by localizing dual leucine zipper kinase to axon terminals for protein turnover
Source: eLife. 2024 Oct 30;13:RP96592. doi: 10.7554/eLife.96592 (PMC11524585; doi:10.7554/eLife.96592)
Supplement: Figure 1—figure supplement 1—source data 1. [file elife-96592-fig1-figsupp1-data1.xlsx]

## Sheet: Sup_F1-B
				5'-Wnd::GFP-3' (DLKi)	Wnd::GFP (DLKi)	Wnd-KD::GFP	Wnd-KD::GFP (DLKi)	Wnd-KD::GFP (DMSO)			5'-Wnd::GFP-3' (DLKi)	Wnd::GFP (DLKi)	Wnd-KD::GFP	Wnd-KD::GFP (DLKi)	Wnd-KD::GFP (DMSO)
				7.89395	11.6374	11.7981	11.4386	10.0211		Median	8.676	7.988	12.04	10.23	9.971
				8.52839	11.8439	4.59612	11.2	8.41805		Mean	8.985	9.659	11.7	10.53	10.09
				6.29207	27.4393	8.73391	8.95987	9.92101		SD	2.398	4.897	4.743	2.035	3.156
				8.46424	5.21388	17.048	9.26877	5.20653		Number	26	22	10	6	6
				10.8388	7.22844	13.3498	13.8566	13.7733
				9.91794	7.89268	12.2772	8.45613	13.1831
				5.02439	7.96372	19.5595
				8.69092	6.55692	7.37091
				8.7952	8.0125	15.0475
				15.489	5.9293	7.24572
				9.29442	13.1508
				8.81894	12.7297
				11.008	7.39606
				8.26336	7.5496
				15.7329	10.2077
				9.05314	10.8878
				8.55311	3.2208
				6.59187	9.75506
				9.67578	7.67847
				8.10031	9.50303
				10.0355	14.9099
				6.75446	5.79226
				9.06427
				6.27338
				7.79634
				8.66033
