# Supplementary material for: Rab11 suppresses neuronal stress signaling by localizing dual leucine zipper kinase to axon terminals for protein turnover
Source: eLife. 2024 Oct 30;13:RP96592. doi: 10.7554/eLife.96592 (PMC11524585; doi:10.7554/eLife.96592)
Supplement: Figure 1—source data 1. [file elife-96592-fig1-data1.xlsx]

## Sheet: Figure 1D
	5'-Wnd::GFP-3'	Wnd::GFP	Wnd-KD::GFP			5'-Wnd::GFP-3'	Wnd::GFP	Wnd-KD::GFP
	7.89395	11.6374	11.4386		Median	8.676	7.988	10.23
	8.52839	11.8439	11.2		Mean	8.985	9.659	10.53
	6.29207	27.4393	8.95987		SD	2.398	4.897	2.035
	8.46424	5.21388	9.26877		Number	26	22	6
	10.8388	7.22844	13.8566
	9.91794	7.89268	8.45613
	5.02439	7.96372
	8.69092	6.55692
	8.7952	8.0125
	15.489	5.9293
	9.29442	13.1508
	8.81894	12.7297
	11.008	7.39606
	8.26336	7.5496
	15.7329	10.2077
	9.05314	10.8878
	8.55311	3.2208
	6.59187	9.75506
	9.67578	7.67847
	8.10031	9.50303
	10.0355	14.9099
	6.75446	5.79226
	9.06427
	6.27338
	7.79634
	8.66033

## Sheet: Figure 1E
	Cell body			Cell body				Axon terminal			Axon terminal
	wt	hiwN			wt	hiwN		wt	hiwN			wt	hiwN
	49.5745	39.709		Median	47.05	39.71		84.873	591.391		Median	88.14	583.2
	40.2362	42.7683		Mean	45.4	40.54		182.702	583.161		Mean	92.54	632.4
	55.6287	25.9668		SD	11.19	11.22		89.213	842.609		SD	45.26	102.9
	24.4582	61.8035		Number	8	9		27.388	712.511		Number	8	9
	59.962	31.5255						104.349	571.166
	38.314	30.9133						87.075	717.03
	44.5217	47.8563						109.939	583.067
	50.5275	34.935						54.787	573.599
		49.3655							517.292
