# Supplementary material for: Rab11 suppresses neuronal stress signaling by localizing dual leucine zipper kinase to axon terminals for protein turnover
Source: eLife. 2024 Oct 30;13:RP96592. doi: 10.7554/eLife.96592 (PMC11524585; doi:10.7554/eLife.96592)
Supplement: Figure 2—figure supplement 1—source data 1. [file elife-96592-fig2-figsupp1-data1.xlsx]

## Sheet: Sup_F2-1
	WndC130S::GFP			WndC130S::GFP
	0.737		Median	0.819
	0.795		Mean	0.8043
	0.877		SD	0.06457
	0.891		Number	22
	0.837
	0.684
	0.82
	0.85
	0.768
	0.776
	0.856
	0.661
	0.862
	0.826
	0.818
	0.908
	0.742
	0.836
	0.76
	0.838
	0.74
	0.813
