# Supplementary material for: Rab11 suppresses neuronal stress signaling by localizing dual leucine zipper kinase to axon terminals for protein turnover
Source: eLife. 2024 Oct 30;13:RP96592. doi: 10.7554/eLife.96592 (PMC11524585; doi:10.7554/eLife.96592)
Supplement: Figure 2—figure supplement 2—source data 1. [file elife-96592-fig2-figsupp2-data1.xlsx]

## Sheet: Sup_F2-2
	Wnd-KD::GFP	Wnd100-KD::GFP	Wnd200::GFP	Wnd101-200::GFP			Wnd-KD::GFP	Wnd100-KD::GFP	Wnd200::GFP	Wnd101-200::GFP
	0.639	0.446	0.098	0.177		Median	0.513	0.5495	0.1215	0.142
	0.75	0.644	0.168	0.125		Mean	0.5017	0.5738	0.1251	0.1523
	0.411	0.601	0.131	0.125		SD	0.117	0.1456	0.02979	0.02806
	0.562	0.404	0.119	0.17		Number	23	26	28	15
	0.536	0.484	0.106	0.14
	0.479	0.569	0.1	0.133
	0.513	0.533	0.102	0.21
	0.367	0.618	0.09	0.136
	0.662	0.574	0.112	0.192
	0.539	0.658	0.124	0.122
	0.57	0.554	0.211	0.142
	0.544	0.896	0.094	0.152
	0.534	0.46	0.117	0.144
	0.631	0.673	0.16	0.188
	0.434	0.424	0.157	0.129
	0.401	0.545	0.137
	0.478	0.446	0.127
	0.361	0.394	0.143
	0.433	0.509	0.176
	0.328	0.519	0.098
	0.345	0.432	0.11
	0.657	0.73	0.111
	0.364	0.47	0.119
		1	0.125
		0.661	0.07
		0.674	0.127
			0.146
			0.125
