# Supplementary material for: Rab11 suppresses neuronal stress signaling by localizing dual leucine zipper kinase to axon terminals for protein turnover
Source: eLife. 2024 Oct 30;13:RP96592. doi: 10.7554/eLife.96592 (PMC11524585; doi:10.7554/eLife.96592)
Supplement: Figure 2—figure supplement 3—source data 1. [file elife-96592-fig2-figsupp3-data1.xlsx]

## Sheet: Sup_F2-3
	wt	dHIP14ex11			wt	dHIP14ex11
	5.98723	4.37161		Median	6.479	3.903
	7.95763	2.93304		Mean	6.793	3.968
	7.17911	3.84197		SD	1.977	0.8005
	5.11012	3.97428		Number	17	16
	4.80692	3.32867
	4.86836	5.37674
	4.66817	2.28456
	5.16191	3.79972
	8.32476	3.76458
	4.58029	3.57192
	8.78333	4.30194
	10.7322	5.57667
	10.197	3.9029
	6.47913	4.35386
	8.36923	4.19766
	6.84343	3.90343
	5.43607
