# Supplementary material for: Rab11 suppresses neuronal stress signaling by localizing dual leucine zipper kinase to axon terminals for protein turnover
Source: eLife. 2024 Oct 30;13:RP96592. doi: 10.7554/eLife.96592 (PMC11524585; doi:10.7554/eLife.96592)
Supplement: Figure 2—source data 3. [file elife-96592-fig2-data3.xlsx]

## Sheet: Figure 2B
	Wnd-KD	Wnd-KD100	Wnd200	Wnd101-200			Wnd-KD	Wnd-KD100	Wnd200	Wnd101-200
	5.51062	11.4648	0.213908	0.082348		Median	8.047	7.819	0.2003	0.06547
	8.01198	8.01532	0.156284	0.058242		Mean	8.242	8.933	0.2076	0.0613
	8.54233	7.62268	0.254812	0.066946		SD	1.738	2.798	0.04007	0.02096
	7.63016	15.1449	0.30178	0.028018		Number	22	18	13	10
	6.71144	9.26521	0.217512	0.081528
	10.7968	9.79539	0.196063	0.03454
	8.28396	11.8963	0.184581	0.083171
	7.25658	7.01188	0.177182	0.076063
	10.1354	11.7518	0.200299	0.064001
	8.32401	11.595	0.17172	0.038177
	7.59809	5.73914	0.1713
	12.393	6.64446	0.211882
	7.27266	12.2918	0.241218
	9.47062	6.23152
	5.62154	5.80024
	6.2256	7.15074
	8.584	6.50945
	8.37672	6.86735
	7.1553
	8.07438
	8.01935
	11.3353

## Sheet: Figure 2E
	Wnd::GFP	WndC130S			Wnd::GFP	WndC130S
	10.0233	0.265048		Median	10.02	0.3446
	11.2856	0.26934		Mean	10.43	0.3408
	15.4836	0.402051		SD	2.519	0.08149
	9.70498	0.308348		Number	12	10
	6.99694	0.377773
	9.83511	0.402051
	11.2314	0.311362
	10.016	0.208865
	12.0442	0.386185
	13.5822	0.477414
	7.4105
	7.55769
