# Supplementary material for: Rab11 suppresses neuronal stress signaling by localizing dual leucine zipper kinase to axon terminals for protein turnover
Source: eLife. 2024 Oct 30;13:RP96592. doi: 10.7554/eLife.96592 (PMC11524585; doi:10.7554/eLife.96592)
Supplement: Figure 3—source data 3. [file elife-96592-fig3-data3.xlsx]

## Sheet: Figure 3A
	Wnd::GFP	WndC130S::GFP			Wnd::GFP	WndC130S::GFP
	0.05373	0.523954		Median	0.1641	0.7761
	0.143104	0.767272		Mean	0.1617	1.119
	0.185	0.785		SD	0.08797	0.8622
	0.265	2.4		Number	4	4

## Sheet: Figure 3B
	Cell body			Cell body				Axon terminal			Axon terminal
	Wnd::GFP	WndC130S::GFP			Wnd::GFP	WndC130S::GFP		Wnd::GFP	WndC130S::GFP			Wnd::GFP	WndC130S::GFP
	39.2927	405.241		Median	34.31	338.8		160.903	28.83		Median	110.1	35.54
	16.824	272.296		Mean	33.8	326.9		47.525	42.247		Mean	109	40.56
	34.213	420.708		SD	11.75	102.9		116.01	28.209		SD	44.63	16.28
	43.762	209.229		Number	8	4		138.505	62.972		Number	8	4
	31.668							104.173
	34.4102							104.167
	51.5628							156.716
	18.6878							43.985
