# Supplementary material for: Rab11 suppresses neuronal stress signaling by localizing dual leucine zipper kinase to axon terminals for protein turnover
Source: eLife. 2024 Oct 30;13:RP96592. doi: 10.7554/eLife.96592 (PMC11524585; doi:10.7554/eLife.96592)
Supplement: Figure 4—figure supplement 1—source data 1. [file elife-96592-fig4-figsupp1-data1.xlsx]

## Sheet: Sup_F4-1
	Wnd-KD::GFP	Wnd::GFP	WndC130S::GFP			Wnd-KD::GFP	Wnd::GFP	WndC130S::GFP
	6.672	71.165	99.435		Median	4.827	60.51	95.37
	6.56	57.594	49.708		Mean	6.34	60.74	101.7
	4.896	69.579	54.746		SD	4.369	20.4	49.4
	9.034	64.272	56.438		Number	42	49	26
	17.437	34.026	27.577
	3.91	36.805	95.436
	3.19	27.019	99.616
	1.876	56.671	221.004
	4.478	58.983	57.936
	1.976	67.493	84.392
	8.537	48.92	182.973
	5.105	58.911	69.363
	2.721	79.073	54.882
	8.102	84.862	115.829
	5.094	41.937	173.168
	2.622	95.381	147.562
	4.635	87.37	79.676
	3.402	60.947	128.835
	3.276	52.825	79.565
	5.337	81.108	29.089
	3.086	42.984	155.182
	4.705	58.569	146.432
	4.097	68.333	114.624
	4.757	53.923	95.296
	3.924	43.367	148.583
	7.746	46.378	78.003
	2.381	75.812
	3.664	137.629
	1.691	89.235
	4.695	67.166
	2.061	89.872
	3.314	60.111
	8.387	28.052
	17.031	31.401
	5.746	35.706
	5.206	14.719
	6.182	60.5055
	17.106	60.2094
	12.326	60.282
	11.755	60.0238
	10.871	59.9058
	16.679	60.6247
		61.2863
		62.2382
		62.3929
		62.4876
		62.3485
		62.7216
		62.8274
