# Supplementary material for: Rab11 suppresses neuronal stress signaling by localizing dual leucine zipper kinase to axon terminals for protein turnover
Source: eLife. 2024 Oct 30;13:RP96592. doi: 10.7554/eLife.96592 (PMC11524585; doi:10.7554/eLife.96592)
Supplement: Figure 4—figure supplement 2—source data 1. [file elife-96592-fig4-figsupp2-data1.xlsx]

## Sheet: Sup_F4-2
	GMR	Wnd::GFP	WndC130S::GFP	WndKD::GFP	GMR>Wnd::GFP	GMR>WndC130S::GFP	GMR>WndKD::GFP			GMR	Wnd::GFP	WndC130S::GFP	WndKD::GFP	GMR>Wnd::GFP	GMR>WndC130S::GFP	GMR>WndKD::GFP
	42.158	49.041	41.939	44.946	22.72	13.056	47.133		Median	47.33	46.03	46.56	47.14	23.27	16.79	45.49
	43.237	45.476	45.184	47.382	25.191	18.035	48.613		Mean	46.71	45.63	45.75	46.67	24	16.57	45.58
	49.766	46.404	43.378	46.775	21.953	14.555	45.486		SD	2.748	3.093	2.953	2.571	2.925	2.363	2.924
	45.024	48.16	46.851	45.431	21.081	17.143	46.129		Number	21	22	20	24	17	16	23
	44.623	43.396	41.885	49.596	23.269	14.739	43.985
	48.549	46.16	47.592	42.887	29.31	20.877	50.8
	47.328	49.352	48.923	49.378	20.997	16.642	41.439
	43.656	50.542	49.943	47.946	21.033	15.412	44.415
	46.312	40.679	47.808	42.902	28.979	18.491	45.716
	48.785	47.956	44.564	46.541	24.476	19.255	49.786
	50.994	40.931	46.273	50.292	20.451	14.47	41.128
	46.053	45.615	42.029	46.95	26.418	16.928	48.448
	50.172	41.699	47.255	48.486	27.741	18.364	43.171
	47.939	43.001	48.125	41.422	22.067	19.276	40.633
	49.574	49.321	41.892	47.815	24.519	12.933	47.542
	47.389	41.017	43.528	49.086	26.436	15.02	42.086
	44.544	49.065	50.741	49.401	21.318		45.203
	48.287	43.66	46.865	46.116			48.928
	41.439	46.672	48.579	47.986			41.932
	45.638	47.384	41.708	47.324			48.312
	49.374	42.5		49.679			44.818
		45.892		41.836			47.31
				44.029			45.318
				45.987
