# Supplementary material for: Rab11 suppresses neuronal stress signaling by localizing dual leucine zipper kinase to axon terminals for protein turnover
Source: eLife. 2024 Oct 30;13:RP96592. doi: 10.7554/eLife.96592 (PMC11524585; doi:10.7554/eLife.96592)
Supplement: Figure 4—source data 1. [file elife-96592-fig4-data1.xlsx]

## Sheet: Figure 4A
	2XUAS-WndGFP	2XUAS-WndC130SGFP			2XUAS-WndGFP	2XUAS-WndC130SGFP
	8.061	51.686		Median	8.522	34.57
	10.69	66.639		Mean	9.385	34.79
	17.479	23.05		SD	3.593	17.55
	8.002	34.961		Number	28	28
	4.492	34.881
	7.369	22.824
	9.187	22.318
	5.451	42.825
	8.768	34.989
	8.642	23.603
	10.578	6.391
	5.584	8.563
	14.461	16.151
	9.909	42.689
	5.965	60.224
	8.137	33.72
	8.402	8.567
	5.735	34.253
	10.766	37.227
	17.982	39.141
	11.194	17.005
	9.197	64.338
	11.122	28.649
	17.074	30.148
	5.944	21.377
	8.03	62.327
	7.332	64.793
	7.223	40.699

## Sheet: Figure 4B
		Pupa-lethal	Eclosed			Pupa-lethal	Eclosed
	2XUAS-Wnd	14	174		Median	40.5	151
	2XUAS-WndC130S	67	128		Mean	40.5	151
					SD	37.48	32.53
					Number	2	2
