# Supplementary material for: Rab11 suppresses neuronal stress signaling by localizing dual leucine zipper kinase to axon terminals for protein turnover
Source: eLife. 2024 Oct 30;13:RP96592. doi: 10.7554/eLife.96592 (PMC11524585; doi:10.7554/eLife.96592)
Supplement: Figure 6—figure supplement 1—source data 1. [file elife-96592-fig6-figsupp1-data1.xlsx]

## Sheet: Sup_F6-1
	Cell body	Axon	Axon termianl			Cell body	Axon	Axon termianl
	0.821	0.579	0.265		Median	0.8435	0.3735	0.303
	0.941	0.388	0.567		Mean	0.8129	0.4109	0.34
	0.879	0.327	0.208		SD	0.1101	0.1086	0.1429
	0.836	0.308	0.2		Number	30	14	21
	0.64	0.359	0.367
	0.556	0.487	0.239
	0.822	0.286	0.265
	0.815	0.3	0.369
	0.803	0.51	0.119
	0.732	0.329	0.433
	0.851	0.6	0.275
	0.687	0.335	0.147
	0.847	0.522	0.303
	0.532	0.423	0.297
	0.883		0.438
	0.84		0.562
	0.751		0.522
	0.855		0.636
	0.723		0.358
	0.667		0.349
	0.961		0.22
	0.855
	0.831
	0.875
	0.981
	0.852
	0.86
	0.856
	0.972
	0.863
