# Supplementary material for: Rab11 suppresses neuronal stress signaling by localizing dual leucine zipper kinase to axon terminals for protein turnover
Source: eLife. 2024 Oct 30;13:RP96592. doi: 10.7554/eLife.96592 (PMC11524585; doi:10.7554/eLife.96592)
Supplement: Figure 6—figure supplement 2—source data 1. [file elife-96592-fig6-figsupp2-data1.xlsx]

## Sheet: Sup_F6-2
	Primer - 1			Primer - 1				Primer - 2			Primer - 2
	wt	Rab1193bi			wt	Rab1193bi		wt	Rab1193bi			wt	Rab1193bi
	122.081	50.164		Median	95	45.43		114.282	66.4426		Median	98.49	66.44
	102.263	45.4329		Mean	100	44.97		90.3533	70.0351		Mean	100	64.8
	94.9984	41.7637		SD	13.38	4.177		98.4888	55.4481		SD	8.979	7.913
	92.7107	39.9229		Number	5	5		95.4124	57.9916		Number	5	5
	87.9469	47.5853						101.463	74.1028
