# Supplementary material for: Rab11 suppresses neuronal stress signaling by localizing dual leucine zipper kinase to axon terminals for protein turnover
Source: eLife. 2024 Oct 30;13:RP96592. doi: 10.7554/eLife.96592 (PMC11524585; doi:10.7554/eLife.96592)
Supplement: Figure 6—source data 3. [file elife-96592-fig6-data3.xlsx]

## Sheet: Figure 6C
	Cell body			Cell body				Axon terminal			Axon terminal
	mCD8::GFP	DN-Rab11			mCD8::GFP	DN-Rab11		mCD8::GFP	DN-Rab11			mCD8::GFP	DN-Rab11
	58.2125	333.264		Median	85.94	344.6		226.306	126.897		Median	160.1	97.78
	62.9327	246.393		Mean	80.32	342.1		105.408	83.521		Mean	166.7	126.3
	85.9412	344.59		SD	18.07	78.56		173.954	143.719		SD	32.88	74.51
	91.0392	428.251		Number	9	9		196.175	69.172		Number	9	9
	104.42	202.778						157.374	314.448
	91.913	320.683						158.916	84.355
	53.7205	374.82						160.128	122.158
	96.1227	440.855						151.918	94.313
	78.583	386.944						169.686	97.784

## Sheet: Figure 6D
	wt	Rab1193bi			wt	Rab1193bi
	5.98723	4.1193		Median	6.479	2.726
	7.95763	1.55938		Mean	6.793	2.891
	7.17911	2.47679		SD	1.977	0.8851
	5.11012	3.15378		Number	17	12
	4.80692	2.47076
	4.86836	3.13303
	4.66817	1.72225
	5.16191	2.56055
	8.32476	4.48266
	4.58029	3.68906
	8.78333	2.42834
	10.7322	2.89054
	10.197
	6.47913
	8.36923
	6.84343
	5.43607

## Sheet: Figure 6E
	wt	Rab1193bi			wt	Rab1193bi
	0.176308	0.652391		Median	0.2761	0.6524
	0.382452	1.06309		Mean	0.2783	0.7621
	0.276123	0.57069		SD	0.1031	0.2639
				Number	3	3
