# Supplementary material for: Rab11 suppresses neuronal stress signaling by localizing dual leucine zipper kinase to axon terminals for protein turnover
Source: eLife. 2024 Oct 30;13:RP96592. doi: 10.7554/eLife.96592 (PMC11524585; doi:10.7554/eLife.96592)
Supplement: Figure 7—source data 1. [file elife-96592-fig7-data1.xlsx]

## Sheet: Figure 7A
	wt		DN-Rab11				wt		DN-Rab11
	DMSO	DLKi	DMSO	DLKi			DMSO	DLKi	DMSO	DLKi
	4.494	3.981	17.634	4.949		Median	6.354	4.241	19.58	6.309
	12.384	4.558	16.132	8.43		Mean	7.235	4.431	20.56	6.351
	5.137	5.418	11.299	4.604		SD	2.252	1.714	6.823	1.814
	6.657	7.339	13.803	6.716		Number	36	42	51	46
	11.488	7.206	19.987	9.774
	7.443	5.664	12.797	7.694
	4.863	3.178	19.139	9.994
	6.205	2.983	22.397	5.178
	5.15	4.455	13.986	7.118
	7.277	1.59	17.638	6.805
	9.084	6.954	17.423	7.9
	4.689	4.344	19.716	8.206
	9.145	4.286	17.683	3.986
	10.232	4.945	13.967	7.009
	4.392	5.91	18.099	2.431
	6.28	4.041	16.954	6.502
	9.334	6.39	17.859	4.96
	6.415	6.643	22.154	6.052
	12.133	4.195	21.338	7.396
	7.178	3.274	17.195	6.994
	6.293	2.118	21.33	6.007
	5.974	3.912	16.806	4.864
	5.644	6.58	16.195	9.552
	5.984	3.115	31.118	7.18
	8.91	1.967	13.202	5.029
	5.395	3.652	16.895	5.485
	7.062	3.03	14.8	8.191
	5.314	7.004	19.712	7.68
	11.988	7.835	27.626	10.005
	6.228	5.922	24.341	3.288
	5.634	2.501	24.482	6.046
	8.392	2.996	21.141	6.724
	8.695	3.465	16.677	6.017
	5.99	2.431	19.626	6.141
	6.822	7	21.462	8.17
	6.146	4.843	26.242	5.123
		3.813	25.982	3.504
		4.531	26.415	3.199
		3.24	19.581	7.764
		1.621	22.111	5.466
		2.858	38.376	3.978
		4.311	51.99	5.193
			17.987	6.177
			12.77	5.088
			25.706	6.44
			21.883	7.158
			21.45
			21.751
			17.466
			29.348
			16.732

## Sheet: Figure 7B
	Elav-Gal4		DN-Rab11		Elav-Gal4/DN-Rab11				Elav-Gal4		DN-Rab11		Elav-Gal4/DN-Rab11
	DMSO	DLKi	DMSO	DLKi	DMSO	DLKi			DMSO	DLKi	DMSO	DLKi	DMSO	DLKi
	0.915483	1.06669	0.943995	1.02412	0.436807	0.546784		Median	0.9993	1.012	1.002	0.985	0.4614	0.6822
	0.971701	1.02891	0.967029	1.03844	0.616194	0.558321		Mean	1	1.003	1.004	0.9943	0.4721	0.6683
	0.995128	1.04489	1.01696	1.01702	0.435235	0.746744		SD	0.0469	0.05058	0.04456	0.04802	0.07505	0.08549
	1.06055	0.959048	0.987064	1.05011	0.554537	0.68089		Number	20	20	20	20	20	20
	0.921954	1.04477	1.00059	0.973769	0.463665	0.531401
	0.984211	1.00189	1.05044	1.06993	0.607324	0.539526
	1.01543	0.901774	1.06842	0.974327	0.498587	0.696314
	1.00352	0.932851	1.0003	0.935022	0.49102	0.707542
	1.04322	1.01921	0.946001	0.985844	0.468938	0.74662
	0.954457	1.00499	0.979558	0.934257	0.440652	0.724744
	0.977284	1.06983	0.931486	1.0518	0.537355	0.624816
	1.07647	0.976933	1.0058	0.96707	0.459075	0.605835
	1.02645	1.03189	1.01347	1.03115	0.303321	0.65674
	0.97685	0.94232	1.07448	0.939426	0.45709	0.797256
	1.05898	1.02587	1.00404	0.91968	0.394627	0.816113
	1.00435	0.961405	0.972653	1.04337	0.546349	0.614085
	1.03681	0.980882	1.05943	0.927103	0.431927	0.630957
	1.05492	1.06348	0.953982	0.984128	0.43538	0.695094
	0.984893	0.939488	1.05343	1.04215	0.484011	0.763326
	0.937337	1.05709	1.0559	0.976436	0.378934	0.683474

## Sheet: Figure 7C
	Elav	DN-Rab11	DN-Rab11,Wnd3	Elav / DN-Rab11	Elav / DN-Rab11,Wnd3			Elav	DN-Rab11	DN-Rab11,Wnd3	Elav / DN-Rab11	Elav / DN-Rab11,Wnd3
	1.00365	1.05758	1.01635	0.347743	0.71764		Median	1.007	1.013	1.01	0.3889	0.7189
	0.987969	0.949552	1.01124	0.332393	0.644208		Mean	1	1.017	1.01	0.3939	0.7198
	1.00809	0.998423	1.03804	0.451211	0.744897		Std. Deviation	0.03608	0.03633	0.03844	0.07609	0.06464
	0.962662	0.99303	1.0721	0.396532	0.843221		Number of values	20	20	20	20	20
	0.982119	0.942914	1.05244	0.332103	0.58762
	0.973448	1.05804	1.07239	0.483945	0.702871
	1.0687	1.00631	0.940342	0.462122	0.803891
	1.01763	0.969632	0.961749	0.293146	0.708057
	1.02203	1.05866	1.02624	0.351643	0.812894
	0.912836	1.00867	0.986973	0.303974	0.745146
	1.02589	1.03995	0.964072	0.406157	0.759293
	1.00776	1.00626	1.00394	0.501079	0.61691
	0.962579	1.01686	0.984774	0.322851	0.724652
	1.01597	1.01462	1.01473	0.254232	0.774643
	1.03755	1.01079	0.965815	0.448971	0.704655
	1.05273	1.05879	1.06368	0.436069	0.755061
	0.954904	1.00747	0.984608	0.371888	0.720129
	1.00656	1.01767	1.03833	0.496391	0.685695
	0.985894	1.067	0.984691	0.503651	0.695818
	1.01104	1.05709	1.00859	0.381306	0.648067
